# Supplementary material for: Diindenocarbazole-based large bandgap copolymers for high-performance organic solar cells with large open circuit voltages
Source: Royal Society of Chemistry journal article supplement (doi:10.1039/c4py00951g), 2014-01-01
Supplement: c4py00951g1.pdf [file c4py00951g1.pdf]

## Supporting Information

### Diindenocarbazole-based large bandgap copolymers for high-performance organic solar cells with large open circuit voltages

Lixin Wang, Dongdong Cai, Zhigang Yin, Changquan Tang, Shan-Ci Chen and Qingdong Zheng,\*

State Key Laboratory of Structural Chemistry, Fujian Institute of Research on the Structure of Matter, Chinese Academy of Sciences, Fuzhou, 350002, P. R. China E-mail: [qingdongzheng@fjirsm.ac.cn](mailto:qingdongzheng@fjirsm.ac.cn)

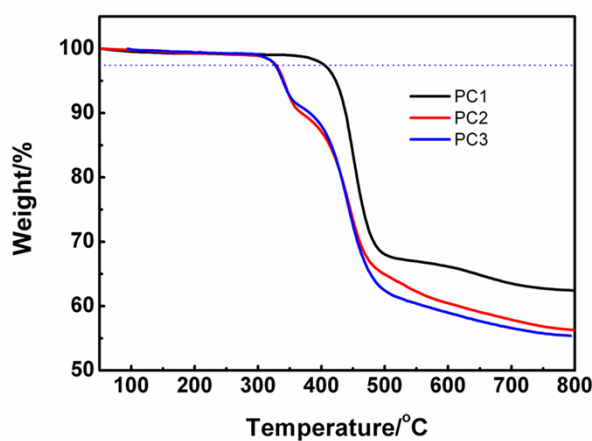

**Figure S1.** TGA plots of the polymers with a heating rate of 10 °C/min under an inert atmosphere.

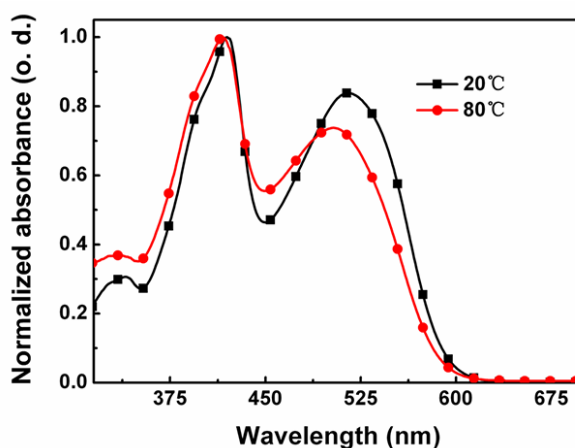

**Figure S2.** UV-vis spectra of PC2 in chlorobenzene solution ( $1 \times 10^{-5}$  M) measured at 20 °C and at 80 °C, respectively.

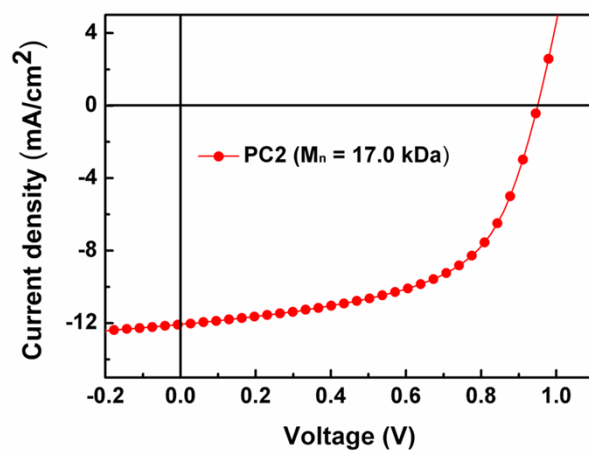

**Figure S3.** Current density-voltage ( $J$ - $V$ ) curve of the optimized conventional PSC based on PC2 (low molecular weight) blended with PC<sub>71</sub>BM (1:4, w/w), under AM 1.5G illumination (100 mW/cm<sup>2</sup>).

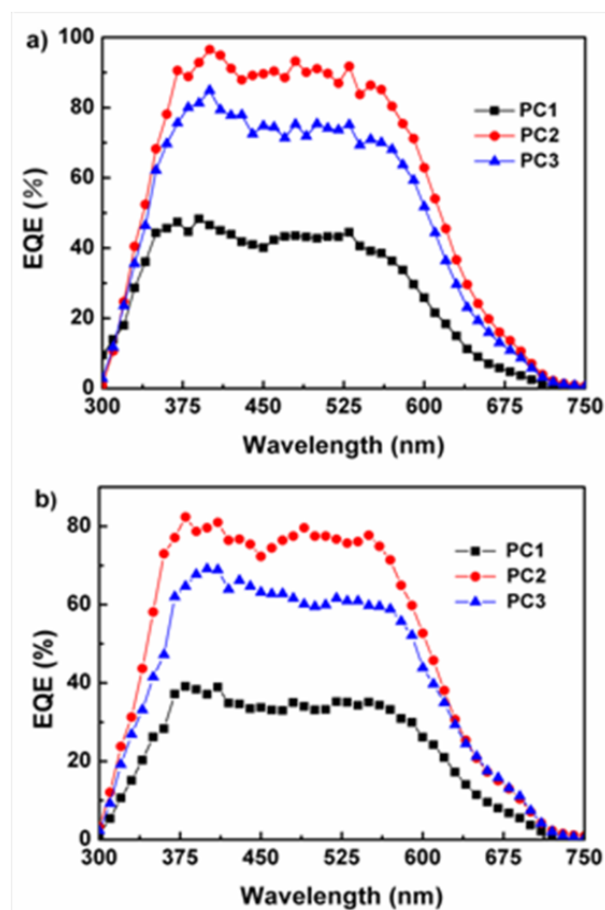

**Figure S4.** EQE curves of the conventional PSCs (a) and the inverted PSCs (b) based on PC<sub>x</sub>:PC<sub>71</sub>BM with 0.5% (v/v) DIO as additive.

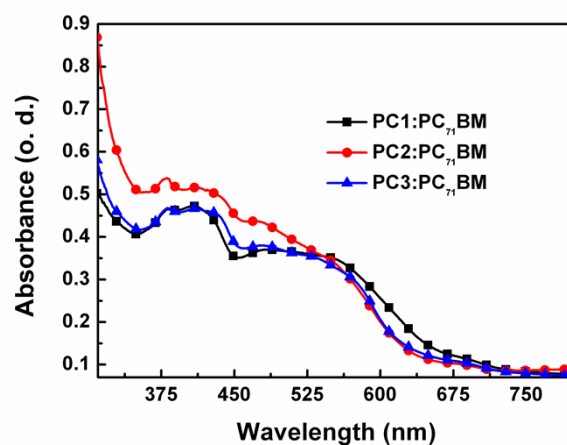

**Figure S5.** Normalized UV-vis absorption spectra of the polymer:PC<sub>71</sub>BM blend films spin-coated under the same conditions as the fabrication of the optimized PSCs.

**Table S1** Photovoltaic performance of the optimized inverted PSCs, under the illumination of AM 1.5G, 100 mW/cm<sup>2</sup>

| Polymer <sup>a</sup> | D:A <sup>b</sup> | $V_{oc}$ [V]    | $J_{sc}$ [mA cm <sup>-2</sup> ] | $FF$ [%]       | PCE <sup>c</sup> [%]   |
|----------------------|------------------|-----------------|---------------------------------|----------------|------------------------|
| PC1                  | 1:4              | $0.75 \pm 0.04$ | $5.13 \pm 0.33$                 | $45.3 \pm 2.9$ | $1.73 \pm 0.16$ (1.84) |
| PC2                  | 1:4              | $0.92 \pm 0.02$ | $10.85 \pm 0.25$                | $59.3 \pm 1.3$ | $5.91 \pm 0.26$ (6.17) |
| PC3                  | 1:4              | $0.94 \pm 0.01$ | $9.17 \pm 0.31$                 | $61.5 \pm 4.7$ | $5.28 \pm 0.47$ (5.75) |

<sup>a</sup> A mixed solvent of *o*-DCB:CB (1:4, v/v) containing 0.5% (v/v) DIO is used. <sup>b</sup> Blend ratio of polymer: PC<sub>71</sub>BM. <sup>c</sup> The data have been averaged over 8 devices of different batches. The performance of the best device is given in parentheses.

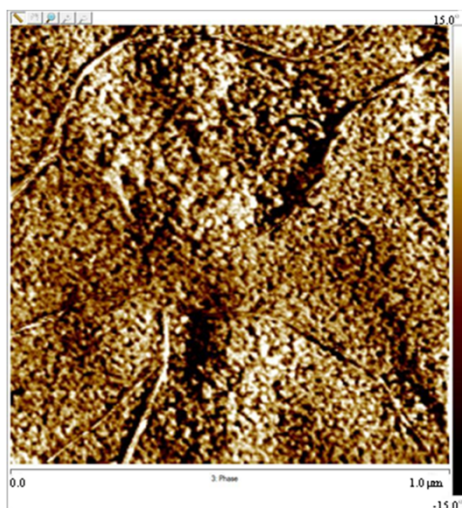

**Figure S6.** Tapping-mode AFM phase image of the blend film of PC1:PC<sub>71</sub>BM processed with 0.5% (v/v) DIO. The scan size is 1.0 μm × 1.0 μm.

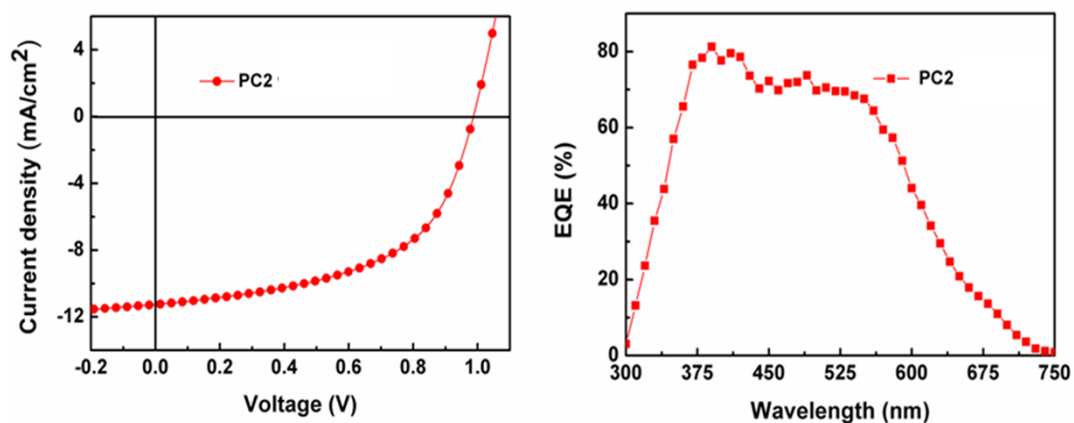

**Figure S7.** Current density-voltage ( $J$ - $V$ ) curve (left) and EQE spectrum (right) of the polymer solar cell based on PC2:PC<sub>71</sub>BM (1:4, w/w) without DIO treatment, under the illumination of AM 1.5G, 100 mW/cm<sup>2</sup>.

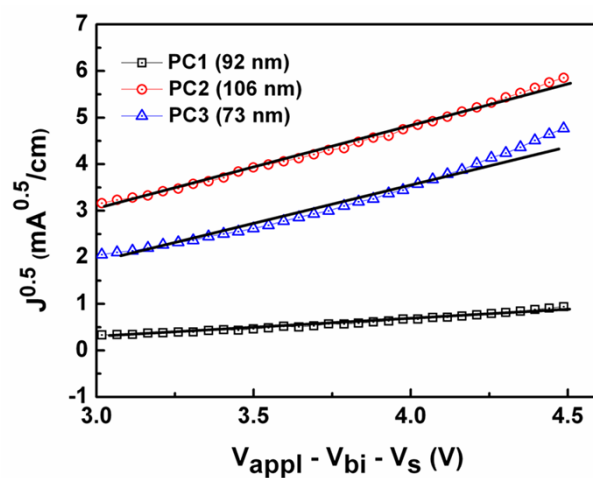

**Figure S8.**  $J^{1/2}$ - $V$  characteristics of PC1, PC2, and PC3 based hole-only devices measured at the ambient temperature.

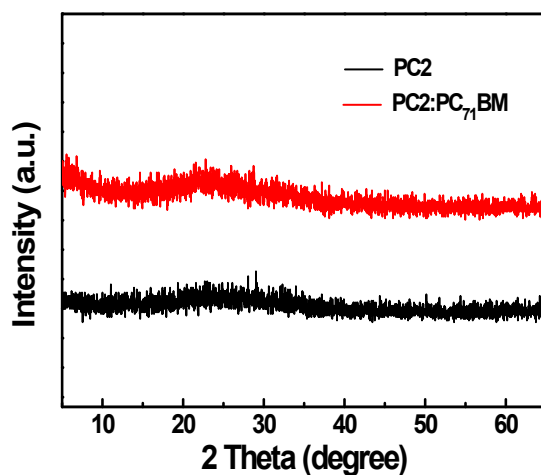

**Figure S9.** X-ray diffraction pattern of PC2 and PC2:PC<sub>71</sub>BM film.
